# Supplementary material for: A bottom-up approach to assess verbal therapeutic techniques. Development of the Psychodynamic Interventions List (PIL)
Source: PubMed Central journal article supplement (PMC5570429; doi:10.1371/journal.pone.0182949), 2017-08-24
Supplement: pone.0182949.s001.pdf [file pone.0182949.s001.pdf]

## Short definitions of the Psychodynamic Interventions List (PIL) categories

### Intervention form (IF; 24 categories)

#### **IF1) Repeating, paraphrasing, summarizing**

The contents of the P's previous statements are repeated, paraphrased, restated, differentiated, summarized or the essence is extracted.

#### **IF2) Drawing attention to a behavioral and/or cognitive pattern**

The T directs the P's attention to a phenomenon, provides the P with a tangible perception of the P's behavioral or cognitive pattern.

#### **IF3) Highlighting discrepancies**

Highlighting contrasting aspects or drawing attention to discrepancies or contradictions of thoughts, experiences or behaviors.

#### **IF4) Implicitly indicating a parallel**

The T implicitly indicates possible parallels between experiences without specifying the parallel (e.g., "Does this event remind you of something else?").

#### **IF5) Parallel without relationship context\***

The T indicates parallels between topics, thoughts, experiences, behaviors, which do not refer to a relationship.

#### **IF6) Parallel regarding behavior towards oneself**

The T indicates parallels between the P's behavior towards him- or herself and the manner others have behaved towards the P.

#### **IF7) Parallel regarding role reversal**

The T indicates parallels between the P's behavior towards others and the manner others have behaved towards the P.

#### **IF8) Parallel regarding others like parents**

The T indicates an association between a P's perception of the behavior of one or more current object relations (e.g., partner, therapist) and the P's experience of a significant carer (e.g., mother).

#### **IF9) Parallel regarding relationships without linking the past and present**

The T indicates parallels between typical current or past interpersonal behavioral pattern without linking past and present.

#### **IF10) Referring to the therapeutic relationship**

The T directly relates the P's statements to the therapeutic relationship.

#### **IF11) Exploring**

Gathering new information with or without a direct question.

#### **IF12) Adding new meaning**

The T adds a new meaning to the contents which are described by the P, links the contents to a not previously verbalized context or integrates them into a new context.

#### **IF13) Creating causal links**

The T makes causal links between thoughts, feelings or behaviors; the focus is the causality (e.g., "...because..").

#### **IF14) Interpretation using metaphors**

An allegory, narrative, proverb or aphorism is introduced by the T to make the P's experience more tangible. It has to add meaning which would have not developed without the metaphor; more than pure repetition and summary in figurative language.

#### **IF15) Encouraging an view or impulse\***

The T encourages a thought, view or behavior, which has previously been hinted at by the P, but the P had not dared to openly discuss it.

**IF16) Validation**

The T expresses encouragement, validates a view, perception, behavior or impulse of the P.

**IF17) Suggestion**

The T gives advice or a recommendation, proposes solutions or proposes his/her experience or asks the P to do or refrain from doing something.

**IF18) Self-disclosure**

The T shares his or her personal experience with the P. The T communicates the effect the P's statements and behaviors have on the T; for example, which feelings and reactions they trigger in the T or the T describes his/her own reactions to the P's statements and behaviors.

**IF19) Association**

The T recalls thematic content which was mentioned by the P in previous sessions or the T reveals pictures, memories, stories which occur to him or her.

**IF20) Expression of emotional sympathy**

Verbally expressed reaction to the P's statements (sympathy, comfort, emotional consolation with the P's experience).

**IF21) Conveying professional knowledge**

The T conveys professional knowledge, explains an issue or a fact; the T remains abstract, general, theoretical and neutral.

**IF22) Other**

Everything, which does not fulfill the criteria of the other categories, including organizational matters.

**IF23) Sentence fragments**

An utterance which is not completed in the following utterance and does not form a complete sentence.

**IF24) Single filler words**

e.g., "hmm", "nah".

**IF4-IF10) Superordinate category Drawing attention to parallels**

Suggestion of a common denominator that describes similarities between different statements, topics and experiences. The sub-categories describe variants with regard to content.

**Thematic content (TC; 9 categories)****TC1) Therapist****TC2) Current object relation**

current relationships, e.g., with partner, children, friends, colleagues

**TC3) Mother****TC4) Father****TC5) Unspecified primary object relation\*****TC6) Other primary object relation****Primary object relation**

Significant others who have shaped the personality structure in the childhood / adolescence (the category is applied when these objects are referred to in the past or in the present)

**TC7) Abstract relationship behavior****TC8) Symptomatology**

Symptoms in the strict sense, e.g., panic attacks, depression, compulsions, eating disorders, pain

**TC9) Content without relationship- or symptomatology-context**

**Temporal focus (TF; 4 categories)**

**TF1) Presence**

Present and recent past of the patient (not including childhood and adolescence)

**TF2) Childhood / adolescence**

**TF3) Symbol**

A topic or theme is addressed by means of a dream, fairy tale, metaphor etc.

**TF4) Other temporal foci (not including presence, childhood / adolescence or symbol)\***

---

P=patient, T=therapist. The detailed definitions of the categories can be requested from the authors. \*= four categories which yielded poor reliability coefficients and should be revised in future studies.
